# Supplementary material
Source: publisher figshare collection journal article supplement (https://karger.figshare.com/ndownloader/files/24989942)
Supplement: Supplementary file 1 [file 24989942]

**Supplementary Table 1.** Preoperative serum concentrations of MPO in relation to 5-year disease-free survival and 10-year overall survival in the subgroups of patients with low/high tissue expression of MMP-2, MMP-8, and MMP-9.

|  | **5-year DFS** | | | **10-year OS** | | |
| --- | --- | --- | --- | --- | --- | --- |
| ***n* (%)** | |  | ***n* (%)** | |  |
| **MPO** | **Low** | **High** | ***p* value** | **Low** | **High** | ***p* value** |
| *Biomarkers in colorectal tumor tissue and serum MPO* | | | | | | |
| MMP-2  Low  High | 1/5 (20.0)  8/41 (19.5) | 4/5 (80.0)  15/28 (53.6) | 0.104  0.002 | 1/5 (20.0)  12/41 (29.3) | 2/5 (40.0)  16/28 (57.1) | 0.136  0.020 |
| MMP-8  Low  High | 2/20 (10.0)  7/26 (26.9) | 9/16 (56.3)  10/17 (58.8) | 0.009  0.030 | 3/20 (15.0)  10/26 (38.5) | 8/16 (50.0)  10/17 (58.8) | 0.026  0.105 |
| MMP-9  Low  High | 4/34 (11.8)  5/12 (41.7) | 9/15 (60.0)  10/18 (55.6) | 0.002  0.442 | 8/34 (23.5)  5/12 (41.7) | 7/15 (46.7)  11/18 (61.1) | 0.064  0.273 |
| *Biomarkers in liver metastasis tissue and serum MPO* | | | | | | |
| MMP-2  Low  High | 3/30 (10.0)  1/18 (5.6) | 8/17 (47.1)  10/21 (47.6) | 0.012  0.001 | 8/30 (26.7)  3/18 (16.7) | 8/17 (47.1)  13/21 (61.9) | 0.220  0.002 |
| MMP-8  Low  High | 5/33 (15.2)  1/17 (5.9) | 10/20 (50.0)  6/16 (37.5) | 0.003  0.112 | 9/33 (27.3)  3/17 (17.6) | 12/20 (60.0)  7/16 (43.8) | 0.003  0.532 |
| MMP-9  Low  High | 3/37 (8.1)  1/11 (9.1) | 16/30 (53.3)  2/8 (25.0) | <0.001  0.124 | 6/37 (16.2)  4/11 (36.4) | 16/30 (53.3)  5/8 (62.5) | 0.001  0.385 |

*P* values (log-rank test) represent comparison of the MPO levels in the subgroups. MPO: low, ≤218.6 ng/ml; high: >218.6 ng/ml. Tissue biomarkers: low, score 0–1; high: score 2–3. MPO, myeloperoxidase; MMP, matrix metalloproteinase; DFS, disease-free survival; OS, overall survival.
